# Supplementary material for: Model-Informed Target Morning 17α-Hydroxyprogesterone Concentrations in Dried Blood Spots for Pediatric Congenital Adrenal Hyperplasia Patients
Source: MDPI journal article supplement (doi:10.3390/ph16030464), 2023-03-21
Supplement: s1 [file s1]

# Deriving target morning $17\alpha$ -hydroxyprogesterone concentrations in dried blood spots for pediatric congenital adrenal hyperplasia patients

Viktoria Stachanow <sup>1,2</sup>, Uta Neumann <sup>3</sup>, Oliver Blankenstein <sup>3,4</sup>, Nele Alder-Baerens <sup>4</sup>, Davide Bindellini <sup>1,2</sup>, Peter Hindmarsh <sup>5</sup>, Richard Ross <sup>6</sup>, Martin J Whitaker <sup>6</sup>, Johanna Melin <sup>1,2</sup>, Wilhelm Huisinga <sup>7</sup>, Robin Michelet <sup>1,\*</sup> and Charlotte Kloft <sup>1</sup>

<sup>1</sup> Department of Clinical Pharmacy and Biochemistry, Institute of Pharmacy, Freie Universität Berlin, Kelchstr 31, 12169 Berlin, Germany; viktoria.stachanow@fu-berlin.de (V.S.); davide.bindellini@fu-berlin.de (D.B.); johanna.s.melin@gmail.com (J.M.); charlotte.kloft@fu-berlin.de (C.K.)

<sup>2</sup> Graduate Research Training Program, PharMetriX, 12169 Berlin, Germany

<sup>3</sup> Charité-Universitätsmedizin, Freie Universität Berlin, 13353 Berlin, Germany; uta.neumann@charite.de (U.N.)

<sup>4</sup> Labor Berlin, Charité Vivantes GmbH, 13353 Berlin, Germany; nele.alder-baerens@charite.de

<sup>5</sup> Developmental Endocrinology Research Group, UCL Institute of Child Health, London WC1E 6BT, UK

<sup>6</sup> Department of Oncology and Metabolism, University of Sheffield, Sheffield S10 2TN, UK; r.j.ross@sheffield.ac.uk (R.J.R.); martin.whitaker@sheffield.ac.uk (M.J.W.)

<sup>7</sup> Institute of Mathematics, Universität Potsdam, 14476 Potsdam, Germany; huisinga@uni-potsdam.de

\* Correspondence: robin.michelet@fu-berlin.de

## 1 Pharmacokinetic/Pharmacodynamic model structure

### Differential equations

$$dA_{\text{depot}}/dt = -\frac{V_{\text{abs,max}} \cdot A_{\text{depot}}}{K_{\text{abs,50}} + A_{\text{depot}}}$$

$$dA_{\text{pla,child}}/dt = \frac{V_{\text{abs,max}} \cdot A_{\text{depot}}}{K_{\text{abs,50}} + A_{\text{depot}}} - CL/V_{\text{cen}} \cdot A_u - Q/V_{\text{cen}} \cdot A_u + Q/V_{\text{per}} \cdot A_{\text{per}}$$

$$dA_{\text{per}}/dt = Q/V_{\text{cen}} \cdot A_u - Q/V_{\text{per}} \cdot A_{\text{per}}$$

$$dA_{\text{RBC}}/dt = K_{\text{aRBC}} \cdot A_u - K_{\text{aRBC}} \cdot A_{\text{RBC}}$$

$$dC_{17-OHP,DBS}/dt = k_{syn} \cdot I - k_{deg} \cdot C_{17-OHP,DBS}$$

### Initial conditions

$$A_{depot,0} = F * DOSE$$

$$A_{pla,child,0} = BASE_{child,pla} * V_{cen}$$

$$A_{per,0} = 0$$

$$A_{RBC,0} = 0$$

$$C_{17-OHP,DBS,0} = OHP_{BASE}$$

### State variables and outputs

$$k_{syn} = OHP_{BASE} \cdot k_{deg}$$

$$I = 1 - \frac{I_{max} \cdot C_{pla,child}^{Hill}}{IC_{50}^{Hill} + C_{pla,child}^{Hill}}$$

$$K_{dA} = K_d * V_{cen}$$

$$A_{max} = B_{max} * V_{cen}$$

$$A_u$$

$$= \frac{A_{pla,child} - K_{dA} \cdot (1 + NS_{Alb}) - A_{max} + \sqrt{(A_{pla,child} - K_{dA} \cdot (1 + NS_{Alb}) - A_{max})^2 + 4 \cdot A_{pla,child} \cdot K_{dA} \cdot (1 + NS_{Alb})}}{2 \cdot (1 + NS_{Alb})}$$

$$C_{pla,child}(t) = A_{pla,child}(t) / V_{cen}$$

### Estimated model parameters

$$k_{deg,ind} = k_{deg,pop} \cdot e^{\eta_{kdeg,ind}} \quad \eta_{kdeg} \sim N(0, \omega_{kdeg})$$

$$IC_{50,ind} = IC_{50,pop} \cdot e^{\eta_{IC50,ind}} \quad \eta_{IC50} \sim N(0, \omega_{IC50})$$

### Fixed model parameters\*

$$Hill = 1$$

$$OHP_{BASE,pop} = OHP_{BASE,observed} \text{ OR } 1/2 \text{ LLOQ}$$

$$OHP_{BASE,ind} = OHP_{BASE,pop} \cdot e^{\eta_{OHPBASE,ind}} \cdot RUV \quad \eta_{OHPBASE} \sim N(0, \omega_{OHPBASE})$$

$$\eta_{OHPBASE} = 1$$

\*2 out of 18 17-OHP baseline DBS observations were below the lower limit of quantification (LLOQ) and were replaced by the LLOQ divided by two (= 1.3/2 nmol/L).

### Handling data below the lower limit of quantification

25% (22/88) of all venous DBS 17-OHP concentrations were below the LLOQ (22.5% in young children and 35.3% in infants). Thus, the M3 method [20] was applied where all observations were fitted to the model, including the concentrations below the LLOQ which were treated as censored observations for which the likelihood of an observation being below the LLOQ given the model parameters is maximized.

## 2 NONMEM model code

\$PROBLEM

PKPD indirect response model, cortisol plasma and 17-OHP in DBS, pediatric model

\$INPUT

ID TIME AMT DROP=RATE MDV ODV EVID BLQ CMT FLAG ICL IV1 IQ IV2 IKaRBC IIBASE  
IBMAX IKD INSALB IVM IKM IF1

\$DATA Data\_PKPD.csv IGNORE=@

\$SUBROUTINE ADVAN13 TOL=15

\$MODEL

NCOMPARTMENTS=5 NPARAMETERS=3

COMP = (DEPOT DEFDOSE) ;dose compartment

COMP = (CENTRAL DEFOBSERVATION) ;central plasma concentration

COMP = (PERIPH) ;peripheral plasma compartment

COMP = (OUTPUT1) ;compartment with cortisol bound to erythrocytes

COMP = (EFFECT) ;compartment with indirect response, inhibition of synthesis

\$PK

;; individual PK parameter estimates from previous PK model (Stachanow et al., 2022) [11]

CL = ICL ;clearance (CL)

V1 = IV1 ;central volume of distribution (Vcen)

Q = IQ ;intercompartmental clearance (Q)

V2 = IV2 ;peripheral volume of distribution (Vper)

KaRBC = IKaRBC ;association constant for red blood cells (kaRBC)

IIBASE = IIBASE ;pediatric plasma cortisol baseline (BASEchild,pla)

BMAX = IBMAX ;maximum binding capacity for CBG binding (Bmax)

KD = IKD ;equilibrium dissociation constant for CBG binding (Kd)

NSALB = INSALB ;linear non-specific parameter for albumin binding (NSAlb)

VM = IVM ;maximum absorption rate (Vmax)

KM = IKM ;amount in depot compartment resulting in half of Vmax (Km)

F1 = IF1 ;bioavailability (F)

;; PD Parameters

IMAX = 1 ;maximum inhibitory effect (Imax)

GAM = 1 ;Hill coefficient (Hill)

TVKDEG = THETA(1) ;first-order degradation rate constant of 17-OHP (kdeg)

TVIC50 = THETA(2) ;cortisol conc. leading to 50% of the maximum inhibitory effect (IC50)

MU\_1 = TVKDEG

MU\_2 = TVIC50

KDEG = EXP(MU\_1 + ETA(1))

IC50 = EXP(MU\_2 + ETA(2))

;17-OHP baseline observations in DBS

BASEDV = ODV

;17-OHP baseline observations in DBS if no baseline observation given

IF(ODV.LT.1.3) THEN

BASEDV = 0.65 ;BLQ baselines replaced by 1/2 LLOQ

ENDIF

OHPBASE = BASEDV\*EXP(ETA(3)\*THETA(3))

KSYN = OHPBASE\*KDEG ;17-OHP synthesis rate (ksyn)

;converting concentrations to amounts

KDa = KD\*V1

AMAX = BMAX\*V1

;amount at timepoint 0 in central plasma compartment and in 17-OHP DBS compartment

A\_0(2) = IBASE\*V1

A\_0(5) = OHPBASE

IF(IC50.EQ.0) THEN

IC50 = 0.001

ENDIF

IF(IC50.LT.0) THEN

IC50 = 0.001

ENDIF

k10 = CL/V1

k12 = Q/V1

k21 = Q/V2

; Time after dose

TAD = 0

IF (AMT.GT.0) THEN

TDOS = TIME

TAD = 0.0

ENDIF

IF (AMT.EQ.0) TAD = TIME-TDOS

IF (TAD.LT.0) TAD = 0

```
;;LLOQ of 17-OHP in DBS
```

```
LLOQ = LOG(1.3)
```

```
$DES
```

```
;;calculating unbound amount in plasma with binding model of previous model(s)
```

```
AUP = (A(2)-KDa*(1+NSALB) - AMAX + SQRT(((A(2) - KDa*(1 + NSALB) -AMAX)**2) +  
4*KDa*A(2)*(1 + NSALB)))/(2*(1 + NSALB))
```

```
DADT(1) = -(VM*A(1)/(KM+A(1)))
```

```
;saturable absorption
```

```
DADT(2) = (VM*A(1)/(KM+A(1))) - k10*AUP - k12*AUP + k21*A(3)
```

```
;central compartment
```

```
DADT(3) = -k21*A(3)+k12*AUP
```

```
;peripheral compartment
```

```
DADT(4) = AUP* KaRBC -A(4)* KaRBC
```

```
;red blood cell compartment
```

```
CP = A(2)/V1
```

```
IF(CP.LT.0) THEN
```

```
CP=0.001
```

```
ENDIF
```

```
INH = 1-(IMAX*CP**GAM/(IC50**GAM+CP**GAM))
```

```
DADT(5) = KSYN*INH-KDEG*A(5)
```

```
;17-OHP compartment
```

```
$ERROR
```

```
IPRED = A(5)
```

```
IF(IPRED.GT.0) THEN
```

```
IPRED = IPRED
```

```
ELSE
```

```
IPRED = IPRED+0.0001
```

```
ENDIF
```

```
IPRED = LOG(IPRED)
```

```
W = THETA(3)
```

```
IRES= DV-IPRED
```

```
IWRES = IRES/W
```

```
IF(BLQ.EQ.0) THEN
```

```
F_FLAG = 0
```

```
Y = IPRED+W*EPS(1)
```

```
ELSE
```

```
F_FLAG = 1
```

```
DUM = (LLOQ-IPRED)/W
```

```
CUMD = PHI(DUM)
```

```

Y = CUMD
MDVRES = 1
ENDIF
$THETAI
THETA(1:2) = DLOG(THETAI(1:2))

```

```

$THETAR
THETAR(1:2) = EXP(THETA(1:2))

```

```

$THETA
(0, 1.22)      ;1. KDEG [1/h]
(0, 20)        ;2. IC50 [nmol/L]]
(0, 0.2)       ;3. RUV

```

```

$OMEGA
0.0025 FIX     ;KDEG
(0.0025, 0.5) ;IC50
1 FIX         ;OHPBASE

```

```

$SIGMA 1 FIX

```

```

$ESTIMATION METHOD=IMP MAP LAPLACE INTERACTION NITER=2000 ISAMPLE=300
SEED=987213 NOABORT NSIG=3 PRINT=1 NOABORT FILE=psn.ext
SIGL=9 GRD=DDDS
$ESTIMATION METHOD=IMP MAP LAPLACE INTERACTION NITER=200 ISAMPLE=3000
SEED=987213 NOABORT NSIG=3 PRINT=1 NOABORT FILE=psn.ext
SIGL=15 EONLY=1 GRD=DDDS
$COVARIANCE PRINT=E UNCONDITIONAL SIGL=9

```

```

$TABLE ID TIME TAD DV PRED IPRED WRES IWRES CWRES MDV BLQ AUP CP FLAG
ONEHEADER NOPRINT FILE=sdtab313_1_2

```

```

$TABLE ID TIME TAD DV CL V1 Q V2 KaRBC IBASE BMAX KD NSALB VM KM F1 ODV
FLAG ETA1 ETA2 ETA3 KSYN KDEG OHPBASE IMAX IC50 GAM NOAPPEND ONEHEADER
NOPRINT FILE=patab313_1_2

```

```

$TABLE ID TIME TAD DV FLAG NOAPPEND ONEHEADER NOPRINT FILE=catab313_1_2
$TABLE ID TIME TAD DV ODV FLAG NOAPPEND ONEHEADER NOPRINT FILE=cotab313_1_2

```

## 3 Supplementary Tables and Figures

**Table S1. Summary of population characteristics in all datasets leveraged in the modeling and simulation analysis, by framework step as described in Figure S1.**

|                                   | <b>Step A:<br/>PK/PD modeling</b>                | <b>Step B:<br/>Bland-Altman and<br/>Passing-Bablok analysis</b>  | <b>Step C:<br/>Simulation of target<br/>range</b> |
|-----------------------------------|--------------------------------------------------|------------------------------------------------------------------|---------------------------------------------------|
| <b>Population</b>                 | Pediatric CAH patients<br>(n=18), clinical study | Pediatric CAH patients<br>(n=15), clinical routine<br>monitoring | Non-CAH children<br>(n=28)                        |
| <b>Analyte and<br/>matrix</b>     | Cortisol in plasma<br>17-OHP in venous DBS       | Cortisol and 17-OHP in<br>capillary and venous DBS               | Cortisol in plasma                                |
| <b>Number of<br/>samples</b>      | 88 (per matrix)                                  | 15                                                               | 2016                                              |
| <b>Age,<br/>median (range)</b>    | 2.5 years<br>(4 months – 5 years)                | 8 years<br>(2 months – 11 years)                                 | (5-9) years                                       |
| <b>Weight,<br/>median (range)</b> | 15 (7-21) kg                                     | -                                                                | -                                                 |

Congenital adrenal hyperplasia (CAH), 17 $\alpha$ -hydroxyprogesterone (17-OHP), dried blood spots (DBS)





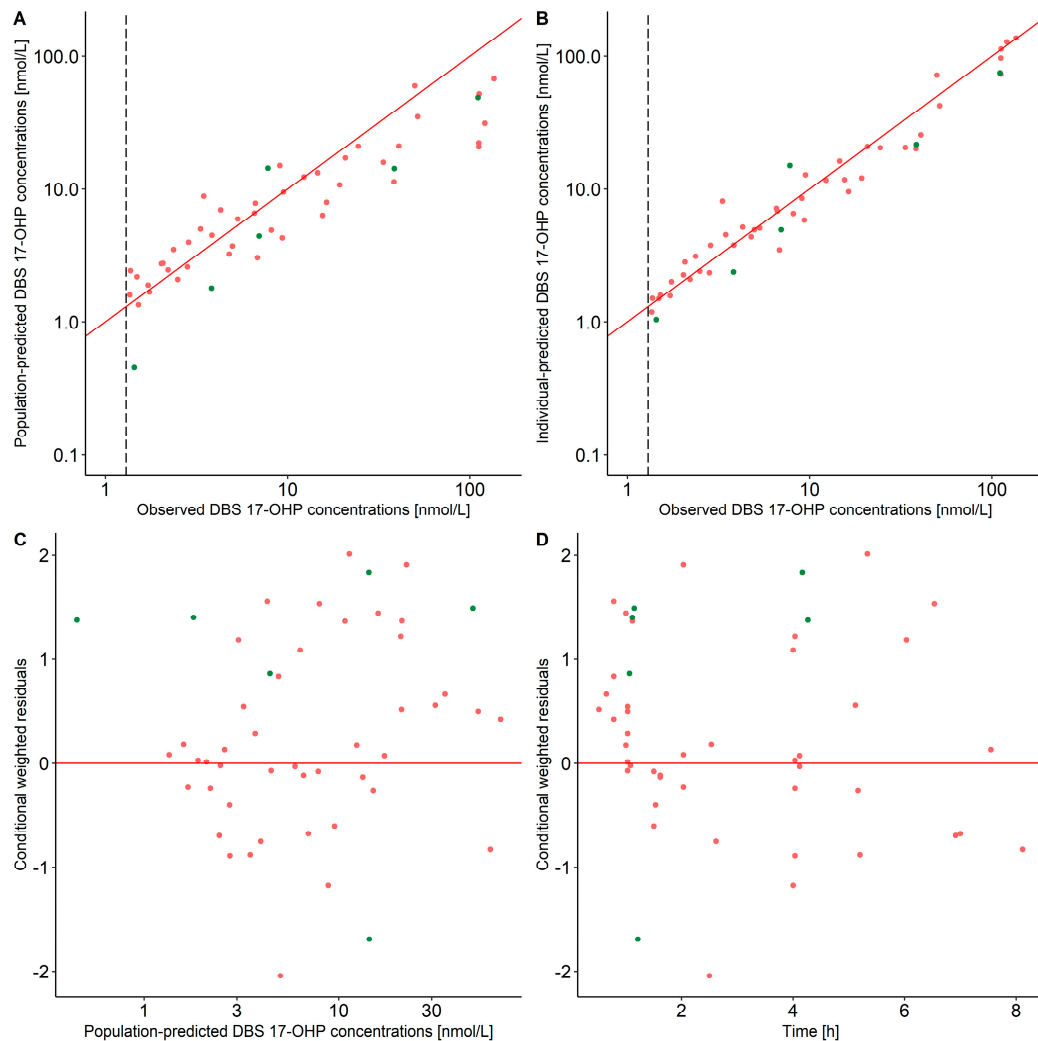

**Figure S2.** Goodness-of-fit plots for developed pharmacokinetic/pharmacodynamic (PK/PD) model.

A: Population-predicted dried blood spot (DBS) 17 $\alpha$ -hydroxyprogesterone (17-OHP) concentrations versus observed DBS 17-OHP concentrations, B: Individual DBS 17-OHP predictions versus observed DBS 17-OHP concentrations, C: Conditional weighted residuals versus population-predicted DBS 17-OHP concentrations, D: Conditional weighted residuals versus time. Red dots: children (cohort 1, age: 2-6 years), green dots: infants (cohort 2, age: 28 days-2 years), red line: line of identity (A, B), line  $y=0$  (C, D), vertical dashed line: lower limit of quantification (LLOQ) = 1.3 nmol/L.

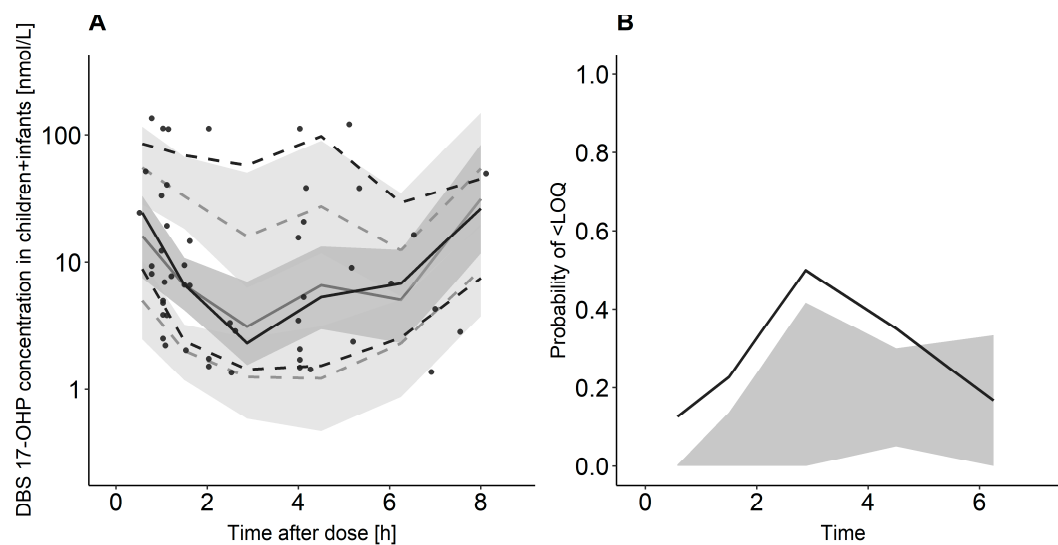

**Figure S3.** Visual predictive check (n=1000) for developed pharmacokinetic/pharmacodynamic (PK/PD) model.

A: Circles: 17 $\alpha$ -hydroxyprogesterone (17-OHP) dried blood spot (DBS) observations, solid line: 50<sup>th</sup> percentile of observed (black) and simulated (gray) DBS 17-OHP concentrations, dashed lines: 10<sup>th</sup> and 90<sup>th</sup> percentiles of observed (black) and simulated (gray) DBS 17-OHP concentrations, shaded areas: 95 % confidence intervals for the percentiles of the simulated data.

B: Black line: Observed probability of DBS 17-OHP concentrations below lower limit of quantification (LLOQ), gray area: 95 % confidence interval for simulated probability of 17-OHP concentrations below LLOQ.

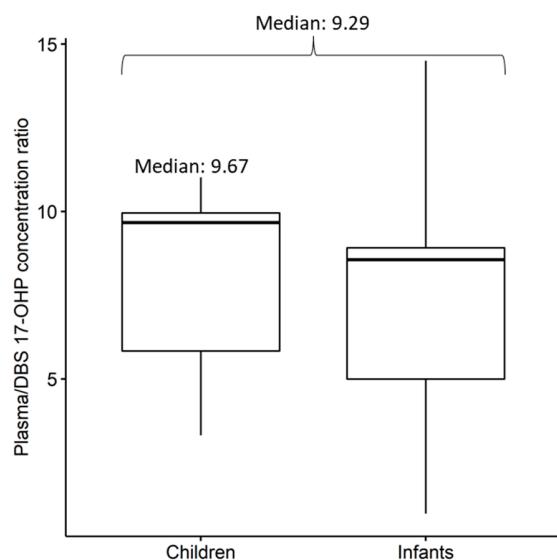

**Figure S4.** Plasma to dried blood spot (DBS) 17 $\alpha$ -hydroxyprogesterone (17-OHP) concentration ratio, measured at baseline in the morning, in young children and infants.
